# Supplementary material for: City Scale Traffic Monitoring Using WorldView Satellite Imagery and Deep Learning: A Case Study of Barcelona
Source: MDPI journal article supplement (doi:10.3390/rs15245709), 2023-12-13
Supplement: s1 [file s1]

Supporting Information

# City Scale Traffic Monitoring Using WorldView Satellite Imagery and Deep Learning: A Case Study of Barcelona

Annalisa Sheehan <sup>1,\*</sup>, Andrew Beddows <sup>1</sup>, David C. Green <sup>1,2</sup> and Sean Beevers <sup>1,2</sup>

<sup>1</sup> MRC Centre for Environment and Health, Imperial College, London, W12 0BZ, UK; a.beddows@imperial.ac.uk (A.B.); d.green@imperial.ac.uk (D.C.G.); s.beevers@imperial.ac.uk (S.B.)  
<sup>2</sup> NIHR HPRU in Environmental Exposures and Health, Imperial College, London, W12 0BZ, UK  
 \* Correspondence: a.sheehan@imperial.ac.uk; asheehan@sgul.ac.uk

Figure S1: Total loss, precision and recall plots averaged every 10 epochs for Model 1: YOLOv3, 3class PSM, RGB, XV-anchors, Im 1500, Ep 1000

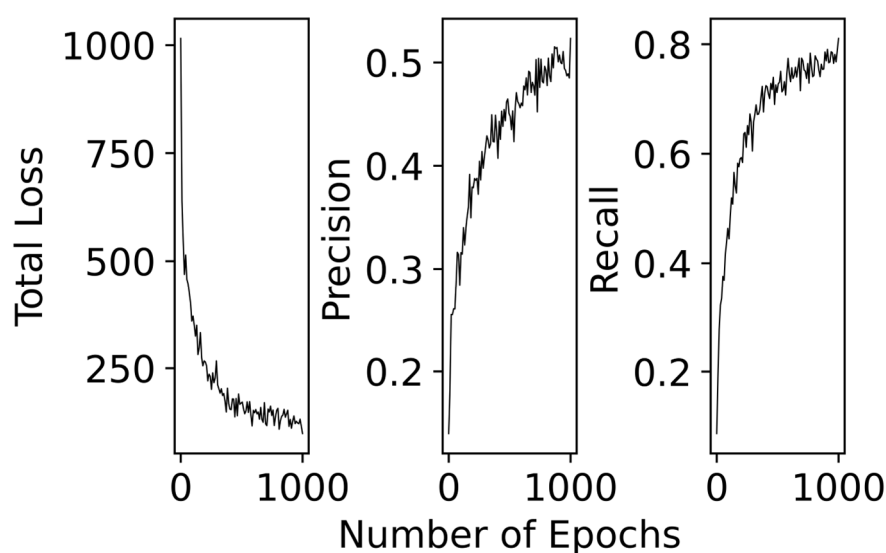

Figure S2: Total loss, precision and recall plots averaged every 10 epochs for Model 2: YOLOv3, PSM, RGB, XV-anchors, Im 1500, Ep 1000

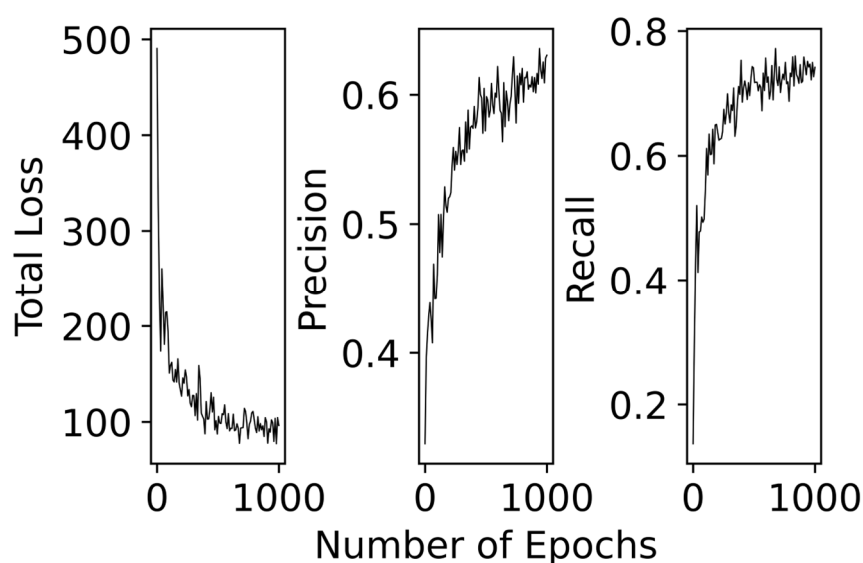

Figure S3: Total loss, precision and recall plots averaged every 10 epochs for Model 3: YOLOv3, SM, RGB, XV-anchors, Im 1500, Ep 1000

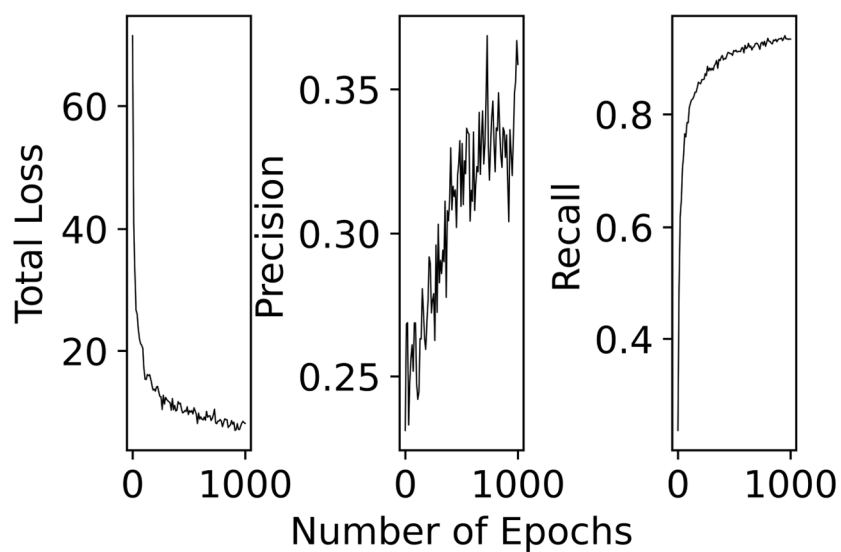

Figure S4: Total loss, precision and recall plots averaged every 10 epochs for Model 4: YOLOv3, PSM, RGB, XV-anchors, NR: 608, Im 1500, Ep 1000

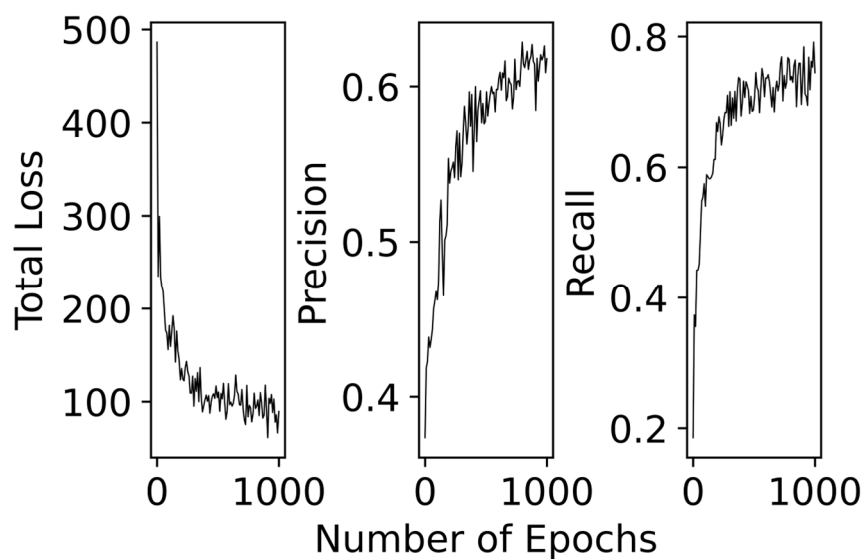

Figure S5: Total loss, precision and recall plots averaged every 10 epochs for Model 5: YOLOv3, PSM, RGC, XV-anchors, Im 1500, Ep 1000

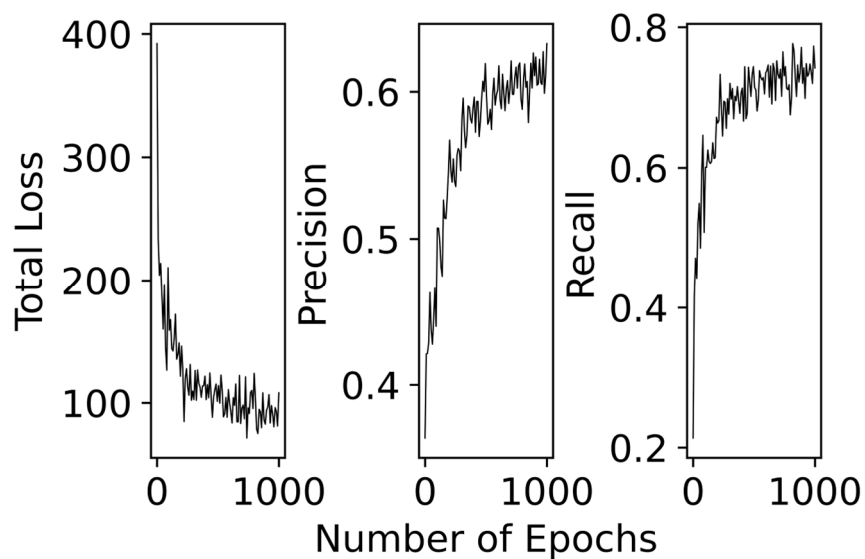

Figure S6: Total loss, precision and recall plots averaged every 10 epochs for Model 8: YOLOv3, SM, RGB, B-anchors, Im 1500, Ep 1000

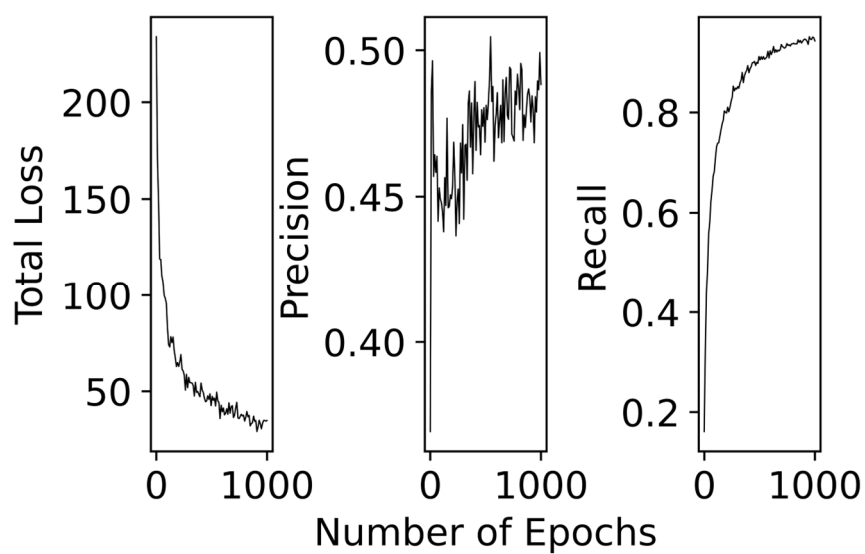

Figure S7: Training data set box loss, precision and recall plots averaged every 10 epochs for Model 9: YOLOv8n, PSM, RGB, Im 416, Ep 300.

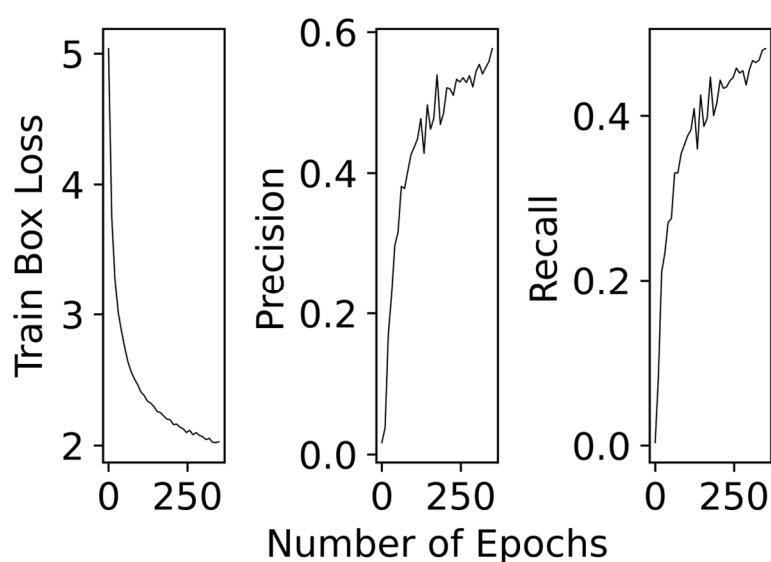

**Table S1.** Vehicle detection YOLOv3 models validation statistics using the test data set. For each model the Precision, Recall and F1 score accuracy metrics are shown. Two validations were undertaken: PSM and SM where PSM used a validation data set consisting of Parked, Static and Moving vehicles, and SM used a validation data set consisting of Static and Moving vehicles. Model parameters include: PSM (Parked, Static and Moving vehicles in a single class), SM (Static and Moving vehicles in a single class) and 3 class PSM (Parked, Static and Moving vehicle split into three separate classes) training data sets, RGB: Red, Green, Blue spectral band image, RGC: Red, Green, Coastal Blue spectral band image, NR: Network Resolution, B-Anchors: Barcelona training data set 9 anchor boxes, XV-anchors: xView challenge data set 30 anchor boxes, Im: Image size in number of pixel width/height, Ep: epochs.

| Model Number | Parameters                                      | Validation type | Precision | Recall | F1 score |
|--------------|-------------------------------------------------|-----------------|-----------|--------|----------|
| 1            | 3class PSM, RGB, XV-anchors, Im 1500, Ep 1000   | PSM             | 0.58      | 0.79   | 0.67     |
|              |                                                 | SM              | 0.12      | 0.82   | 0.22     |
| 2            | PSM, RGB, XV-anchors, Im 1500, Ep 1000          | PSM             | 0.65      | 0.81   | 0.72     |
|              |                                                 | SM              | 0.15      | 0.91   | 0.26     |
| 3            | SM, RGB, XV-anchors, Im 1500, Ep 1000           | PSM             | 0.56      | 0.43   | 0.49     |
|              |                                                 | SM              | 0.25      | 0.91   | 0.39     |
| 4            | PSM, RGB, XV-anchors, NR: 608, Im 1500, Ep 1000 | PSM             | 0.50      | 0.82   | 0.62     |
|              |                                                 | SM              | 0.11      | 0.91   | 0.20     |
| 5            | PSM, RGC, XV-anchors, Im 1500, Ep 1000          | PSM             | 0.58      | 0.82   | 0.68     |
|              |                                                 | SM              | 0.13      | 0.91   | 0.23     |
| 6            | PSM, RGB, B-anchors, Im 1500, Ep 1000           | PSM             | 0.71      | 0.72   | 0.71     |
|              |                                                 | SM              | 0.16      | 0.79   | 0.27     |
| 7            |                                                 | PSM             | 0.64      | 0.77   | 0.70     |

|   |                                         |     |      |      |      |
|---|-----------------------------------------|-----|------|------|------|
|   | PSM, RGB, B-anchors, Im 416,<br>Ep 300  | SM  | 0.15 | 0.84 | 0.26 |
| 8 | SM, RGB, B-anchors, Im 1500,<br>Ep 1000 | PSM | 0.62 | 0.22 | 0.32 |
|   |                                         | SM  | 0.45 | 0.76 | 0.57 |
